# Supplementary material for: Effect of Micromixer Design on Lipid Nanocarriers Manufacturing for the Delivery of Proteins and Nucleic Acids
Source: MDPI journal article supplement (doi:10.3390/pharmaceutics16040507), 2024-04-07
Supplement: s1 [file s1]

**Table S1:** Descriptive statistics of the Box-Behnken test design (batch code DOE10-DOE24)

| <b>Source</b> | <b><i>p-value</i></b> |
|---------------|-----------------------|
| [Lipids]      | 0.25                  |
| TFR           | 0.15                  |
| FFR           | <b>&lt; 0.01</b>      |
| [Lipids]xTFR  | 0.09                  |
| TFRxTFR       | <b>&lt; 0.05</b>      |
| FFRxFFR       | <b>&lt; 0.05</b>      |
